# Supplementary material for: Maternal Influenza Vaccination and the Risk of Laboratory-Confirmed Influenza Among Household Contacts Under the Age of Five in Mali
Source: PubMed Central journal article supplement (PMC6335916; doi:10.4269/ajtmh.18-0450), 2018-12-03
Supplement: tpmd180450.SD1.pdf [file tpmd180450.SD1.pdf]

Supplemental Tables

Table S1. Association between rate of influenza-like illness and household covariates among household contacts under age five

| <b>Covariate</b>                | <b>ILI episodes</b> | <b>Follow up time (days)</b> | <b>Rate per 1000 days</b> | <b>Rate Ratio</b> |
|---------------------------------|---------------------|------------------------------|---------------------------|-------------------|
| <b>Maternal education level</b> |                     |                              |                           |                   |
| <b>No Education</b>             | 1,802               | 712,363                      | 2.53                      | 1.00 (REF)        |
| <b>Any Primary</b>              | 987                 | 402,338                      | 2.45                      | 0.97 (0.90, 1.05) |
| <b>Any Secondary</b>            | 217                 | 109,717                      | 1.98                      | 0.78 (0.68, 0.90) |
| <b>Household Size</b>           |                     |                              |                           |                   |
| <b>Small</b>                    | 454                 | 183,105                      | 2.48                      | 1.00 (REF)        |
| <b>Medium</b>                   | 654                 | 248,975                      | 2.63                      | 1.06 (0.94, 1.19) |
| <b>Large</b>                    | 1,894               | 791,569                      | 2.39                      | 0.97 (0.87, 1.07) |
| <b>Household Crowding</b>       |                     |                              |                           |                   |
| <b>Low</b>                      | 790                 | 309,818                      | 2.55                      | 1.00 (REF)        |
| <b>Medium</b>                   | 1,456               | 584,288                      | 2.49                      | 0.98 (0.90, 1.07) |
| <b>High</b>                     | 760                 | 330,312                      | 2.30                      | 0.90 (0.82, 0.99) |
| <b>Socioeconomic Status</b>     |                     |                              |                           |                   |
| <b>Lowest 25%</b>               | 627                 | 226,892                      | 2.76                      | 1.00 (REF)        |
| <b>Middle 50%</b>               | 1,547               | 611,960                      | 2.53                      | 0.91 (0.83, 1.00) |
| <b>Highest 25%</b>              | 832                 | 385,566                      | 2.16                      | 0.78 (0.70, 0.87) |

Table S2. Association between rate of laboratory-confirmed H1N1 influenza and household covariates among household contacts under age five.

| <b>Covariate</b>                | <b>Laboratory confirmed H1N1</b> | <b>Follow up time (days)</b> | <b>Rate per 1000 days</b> | <b>Rate Ratio</b> |
|---------------------------------|----------------------------------|------------------------------|---------------------------|-------------------|
| <b>Maternal education level</b> |                                  |                              |                           |                   |
| <b>No Education</b>             | 52                               | 712,363                      | 0.07                      | 1.00 (REF)        |
| <b>Any Primary</b>              | 32                               | 402,338                      | 0.08                      | 1.09 (0.70, 1.69) |
| <b>Any Secondary</b>            | 5                                | 109,717                      | 0.05                      | 0.62 (0.25, 1.56) |
| <b>Household Size</b>           |                                  |                              |                           |                   |
| <b>Small</b>                    | 11                               | 183,874                      | 0.06                      | 1.00 (REF)        |
| <b>Medium</b>                   | 18                               | 248,975                      | 0.07                      | 1.21 (0.57, 2.55) |
| <b>Large</b>                    | 60                               | 791,569                      | 0.08                      | 1.27 (0.67, 2.41) |
| <b>Household Crowding</b>       |                                  |                              |                           |                   |
| <b>Low</b>                      | 27                               | 309,818                      | 0.09                      | 1.00 (REF)        |
| <b>Medium</b>                   | 49                               | 584,288                      | 0.08                      | 0.96 (0.60, 1.54) |
| <b>High</b>                     | 13                               | 330,312                      | 0.04                      | 0.45 (0.23, 0.87) |
| <b>Socioeconomic Status</b>     |                                  |                              |                           |                   |
| <b>Lowest 25%</b>               | 23                               | 226,892                      | 0.10                      | 1.00 (REF)        |
| <b>Middle 50%</b>               | 50                               | 611,960                      | 0.08                      | 0.81 (0.49, 1.32) |
| <b>Highest 25%</b>              | 16                               | 385,566                      | 0.04                      | 0.41 (0.22, 0.77) |

Table S3. Assessment for effect modification of association between vaccination status and laboratory-confirmed influenza among household contacts under age five by covariates of interest

| Covariate                       | Vaccine       | Laboratory Confirmed Influenza (N) | Follow up time (days) | Rate per 1000 days | Rate Ratio        | p-value EMM |
|---------------------------------|---------------|------------------------------------|-----------------------|--------------------|-------------------|-------------|
| <b>Household Crowding</b>       |               |                                    |                       |                    |                   |             |
| <b>Low</b>                      | Influenza     | 42                                 | 154,050               | 0.27               | 0.92 (0.61, 1.40) | 0.53        |
|                                 | Meningococcal | 46                                 | 155,768               | 0.29               | 1.00 (REF)        |             |
| <b>Medium</b>                   | Influenza     | 66                                 | 286,460               | 0.23               | 1.01 (0.72, 1.42) |             |
|                                 | Meningococcal | 68                                 | 297,828               | 0.23               | 1.00 (REF)        |             |
| <b>High</b>                     | Influenza     | 24                                 | 176,140               | 0.14               | 0.70 (0.41, 1.20) |             |
|                                 | Meningococcal | 30                                 | 154,172               | 0.19               | 1.00 (REF)        |             |
| <b>Socioeconomic Status</b>     |               |                                    |                       |                    |                   |             |
| <b>Highest 25%</b>              | Influenza     | 26                                 | 190,364               | 0.14               | 0.74 (0.45, 1.23) | 0.51        |
|                                 | Meningococcal | 36                                 | 195,202               | 0.18               | 1.00 (REF)        |             |
| <b>Medium 50%</b>               | Influenza     | 72                                 | 313,917               | 0.23               | 0.89 (0.62, 1.22) |             |
|                                 | Meningococcal | 77                                 | 298,043               | 0.26               | 1.00 (REF)        |             |
| <b>Lowest 25%</b>               | Influenza     | 34                                 | 112,369               | 0.30               | 1.12 (0.69, 1.82) |             |
|                                 | Meningococcal | 31                                 | 114,523               | 0.27               | 1.00 (REF)        |             |
| <b>Maternal Education Level</b> |               |                                    |                       |                    |                   |             |
| <b>No Education</b>             | Influenza     | 81                                 | 356,408               | 0.23               | 1.01 (0.74, 1.38) | 0.49        |
|                                 | Meningococcal | 80                                 | 355,955               | 0.22               | 1.00 (REF)        |             |
| <b>Any Primary</b>              | Influenza     | 42                                 | 200,404               | 0.21               | 0.73 (0.49, 1.08) |             |
|                                 | Meningococcal | 58                                 | 201,934               | 0.29               | 1.0 (ref)         |             |
| <b>Any Secondary</b>            | Influenza     | 9                                  | 59,838                | 0.15               | 1.25 (0.44, 3.5)  |             |
|                                 | Meningococcal | 6                                  | 49,879                | 0.12               | 1.0 (ref)         |             |

EMM: Effect measure modification

Table S4. Assessment for effect modification of association between vaccination status and influenza-like illness among household contacts under age five by covariates of interest

| Covariate                       | Vaccine       | Influenza-like illness (N) | Follow up time (days) | Rate per 1000 days | Rate Ratio        | p-value EMM |
|---------------------------------|---------------|----------------------------|-----------------------|--------------------|-------------------|-------------|
| <b>Household Crowding</b>       |               |                            |                       |                    |                   |             |
| <b>Low</b>                      | Influenza     | 366                        | 154,050               | 2.38               | 0.87 (0.76, 1.00) | 0.01        |
|                                 | Meningococcal | 424                        | 155,768               | 2.72               | 1.00 (REF)        |             |
| <b>Medium</b>                   | Influenza     | 689                        | 286,460               | 2.41               | 0.93 (0.84, 1.03) |             |
|                                 | Meningococcal | 767                        | 297,828               | 2.58               | 1.00 (REF)        |             |
| <b>High</b>                     | Influenza     | 432                        | 176,140               | 2.45               | 1.15 (0.99, 1.33) |             |
|                                 | Meningococcal | 328                        | 154,172               | 2.13               | 1.00 (REF)        |             |
| <b>Socioeconomic Status</b>     |               |                            |                       |                    |                   |             |
| <b>Highest 25%</b>              | Influenza     | 374                        | 190,364               | 1.96               | 0.84 (0.73, 0.96) | 0.01        |
|                                 | Meningococcal | 458                        | 195,202               | 2.35               | 1.00 (REF)        |             |
| <b>Medium 50%</b>               | Influenza     | 782                        | 313,917               | 2.49               | 0.97 (0.88, 1.07) |             |
|                                 | Meningococcal | 765                        | 298,043               | 2.57               | 1.00 (REF)        |             |
| <b>Lowest 25%</b>               | Influenza     | 331                        | 112,369               | 2.95               | 1.14 (0.97, 1.33) |             |
|                                 | Meningococcal | 296                        | 114,523               | 2.58               | 1.00 (REF)        |             |
| <b>Maternal Education Level</b> |               |                            |                       |                    |                   |             |
| <b>No Education</b>             | Influenza     | 927                        | 356,408               | 2.60               | 1.06 (0.96, 1.16) | 0.01        |
|                                 | Meningococcal | 875                        | 355,955               | 2.46               | 1.00 (REF)        |             |
| <b>Any Primary</b>              | Influenza     | 448                        | 200,404               | 2.23               | 0.84 (0.74, 0.95) |             |
|                                 | Meningococcal | 539                        | 201,934               | 2.67               | 1.00 (REF)        |             |
| <b>Any Secondary</b>            | Influenza     | 112                        | 59,838                | 1.87               | 0.89 (0.68, 1.16) |             |
|                                 | Meningococcal | 105                        | 49,879                | 2.10               | 1.00 (REF)        |             |

EMM: Effect measure modification
